# Supplementary material for: Torque-induced precession of bacterial flagella
Source: PubMed Central journal article supplement (PMC4686982; doi:10.1038/srep18488), 2015-12-22
Supplement: srep18488-s4.pdf [file srep18488-s4.pdf]

## **Supplementary Information for**

### **Torque-induced precession of bacterial flagella**

Yuji Shimogonya<sup>1\*</sup>, Yoichiro Sawano<sup>2</sup>, Hiromichi Wakebe<sup>2</sup>, Yuichi Inoue<sup>3</sup>, Akihiko Ishijima<sup>3,4</sup> & Takuji Ishikawa<sup>5</sup>

<sup>1</sup>Frontier Research Institute for Interdisciplinary Sciences, Tohoku University, Sendai 980-8578, Japan. <sup>2</sup>Graduate School of Life Sciences, Tohoku University, Sendai 980-8577, Japan. <sup>3</sup>Institute of Multidisciplinary Research for Advanced Materials, Tohoku University, Sendai 980-8577, Japan. <sup>4</sup>Graduate School of Frontier Biosciences, Osaka University, Osaka 565-0871, Japan. <sup>5</sup>Department of Bioengineering and Robotics, Tohoku University, Sendai 980-8579, Japan.

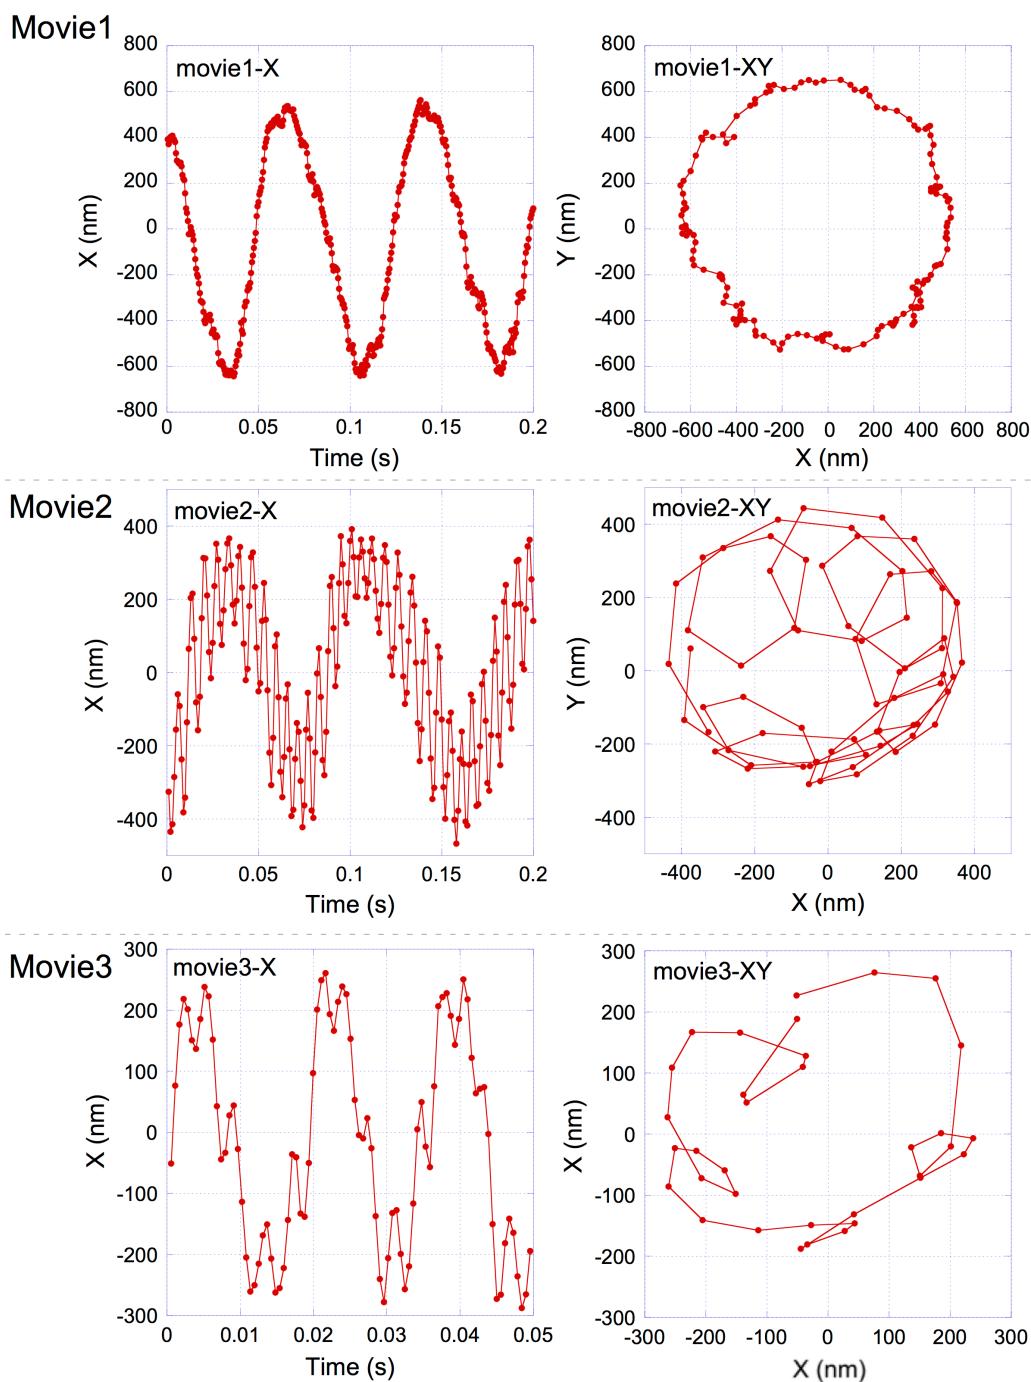

Figure S1. Traces of the videos S1-S3. Centroids of the gold nanoparticles in the videos S1-S3 were analyzed. Time courses of the X-position (Left) and XY trajectories in the first revolution (Right) were shown in video S1 (upper row), video S2 (middle row), video S3 (bottom row). Revolution speeds for videos S1-S3 were  $\sim 13$  Hz,  $\sim 11$  Hz, and  $\sim 57$  Hz, respectively. Spin speed and spin radius were  $\sim 170$  Hz and  $\sim 17$  nm for video S1,  $\sim 150$  Hz and  $\sim 82$  nm for video S2,  $\sim 280$  Hz and  $\sim 50$  nm for video S3.

Table S1. Experimental data of the flagellar precession of *E. coli*. The spin angular velocity  $\Omega_{\text{spin}}$ , revolution angular velocity  $\Omega_{\text{rev}}$ , and revolution radius  $r_b$  were obtained with a probe of the 250 nm-diameter gold nanoparticle for each cell.

| Case | Revolution radius<br>$r_b$ (nm) | Spin angular velocity<br>$\Omega_{\text{spin}}$ (rad/s) | Revolution angular velocity<br>$\Omega_{\text{rev}}$ (rad/s) |
|------|---------------------------------|---------------------------------------------------------|--------------------------------------------------------------|
| 1    | 526                             | 1885                                                    | 166.8                                                        |
| 2    | 573                             | 2513                                                    | 91.7                                                         |
| 3    | 414                             | 899                                                     | 101.3                                                        |
| 4    | 591                             | 1797                                                    | 86.7                                                         |
| 5    | 455                             | 2092                                                    | 299.2                                                        |
| 6    | 475                             | 1144                                                    | 75.7                                                         |
| 7    | 415                             | 1049                                                    | 237.1                                                        |
| 8    | 402                             | 1144                                                    | 246.4                                                        |
| 9    | 638                             | 2092                                                    | 84.3                                                         |
| 10   | 453                             | 1571                                                    | 102.2                                                        |
| 11   | 269                             | 2205                                                    | 324.2                                                        |
| 12   | 1161                            | 1571                                                    | 18.1                                                         |
| 13   | 929                             | 1571                                                    | 39.3                                                         |
| 14   | 429                             | 2094                                                    | 232.7                                                        |
| 15   | 714                             | 1257                                                    | 73.9                                                         |
| 16   | 489                             | 1795                                                    | 76.6                                                         |
| 17   | 1014                            | 2094                                                    | 55.9                                                         |
| 18   | 768                             | 2417                                                    | 112.2                                                        |
| 19   | 450                             | 2371                                                    | 139.6                                                        |
| 20   | 893                             | 2513                                                    | 54.6                                                         |
| 21   | 536                             | 1571                                                    | 85.5                                                         |
| 22   | 607                             | 2513                                                    | 110.2                                                        |
| 23   | 304                             | 872                                                     | 62.0                                                         |
| 24   | 213                             | 1010                                                    | 62.4                                                         |
| 25   | 753                             | 1795                                                    | 21.3                                                         |
| 26   | 456                             | 1126                                                    | 31.1                                                         |
| 27   | 532                             | 1079                                                    | 60.3                                                         |
| 28   | 442                             | 3142                                                    | 93.0                                                         |
| 29   | 343                             | 702                                                     | 53.5                                                         |
| 30   | 334                             | 1405                                                    | 93.6                                                         |
| 31   | 473                             | 1047                                                    | 36.8                                                         |
| 32   | 545                             | 1148                                                    | 28.1                                                         |
| 33   | 405                             | 746                                                     | 46.7                                                         |
| 34   | 646                             | 2513                                                    | 73.9                                                         |
| 35   | 236                             | 1182                                                    | 82.3                                                         |
| 36   | 451                             | 1158                                                    | 94.4                                                         |
| 37   | 326                             | 3142                                                    | 102.2                                                        |
| 38   | 390                             | 1933                                                    | 165.3                                                        |
| 39   | 535                             | 1142                                                    | 27.6                                                         |
| 40   | 449                             | 832                                                     | 24.8                                                         |
| 41   | 324                             | 723                                                     | 75.6                                                         |
| 42   | 511                             | 783                                                     | 39.2                                                         |
